# Supplementary material
Source: PubMed Central journal article supplement (PMC3890689)
Supplement: NIHMS359465-supplement-Supplement_Material.pdf [file NIHMS359465-supplement-Supplement_Material.pdf]

**A SIEVE M-THEOREM FOR BUNDLED PARAMETERS  
 IN SEMIPARAMETRIC MODELS, WITH APPLICATION  
 TO THE EFFICIENT ESTIMATION IN A LINEAR  
 MODEL FOR CENSORED DATA**

(Supplementary Material)

BY YING DING \* AND BIN NAN \*,†

*University of Michigan*

**1. Proofs of technical lemmas.** We first prove the lemmas that are needed for the proofs of Theorems 4.1, 4.2 and 4.3.

1.1. *Proof of Lemma 7.1.* This result follows by direct calculation:

$$\begin{aligned}
 & \dot{l}_\beta(\beta, \zeta(\cdot, \beta); Z) \\
 &= -X \left\{ \Delta \dot{g}(\epsilon_0 - X'(\beta - \beta_0)) \right. \\
 &\quad \left. - \int_a^b 1(\epsilon_0 \geq t) \exp\{g(t - X'(\beta - \beta_0))\} \dot{g}(t - X'(\beta - \beta_0)) dt \right\}, \\
 & \dot{l}_\zeta(\beta, \zeta(\cdot, \beta); Z)[h(\cdot, \beta)] = \frac{\partial}{\partial \eta} l(\beta, (\zeta + \eta h)(\cdot, \beta); Z)|_{\eta=0} \\
 &= \Delta w(\epsilon_0 - X'(\beta - \beta_0)) \\
 &\quad - \int_a^b 1(\epsilon_0 \geq t) \exp\{g(t - X'(\beta - \beta_0))\} w(t - X'(\beta - \beta_0)) dt, \\
 & \ddot{l}_{\beta\beta}(\beta, \zeta(\cdot, \beta); Z) \\
 &= XX' \left\{ \Delta \ddot{g}(\epsilon_0 - X'(\beta - \beta_0)) - \int_a^b 1(\epsilon_0 \geq t) \exp\{g(t - X'(\beta - \beta_0))\} \right. \\
 &\quad \left. \cdot [\ddot{g}(t - X'(\beta - \beta_0)) + \dot{g}^2(t - X'(\beta - \beta_0))] dt \right\},
 \end{aligned}$$

---

\*Supported in part by NSF Grant DMS-07-06700.

†Supported in part by NSF grant DMS-10-07590 and NIH grant R01-AG036802.

*AMS 2000 subject classifications:* Primary 62E20, 62N01; secondary 62D05

*Keywords and phrases:* Accelerated failure time model; B-spline; bundled parameters; efficient score function; semiparametric efficiency; sieve maximum likelihood estimation.

$$\begin{aligned}
& \ddot{l}_{\beta\zeta}(\beta, \zeta(\cdot, \beta); Z)[h(\cdot, \beta)] = \ddot{l}_{\zeta\beta}(\beta, \zeta(\cdot, \beta); Z)[h(\cdot, \beta)] \\
& = -X \left\{ \Delta \dot{w}(\epsilon_0 - X'(\beta - \beta_0)) - \int_a^b 1(\epsilon_0 \geq t) \exp\{g(t - X'(\beta - \beta_0))\} \right. \\
& \quad \left. \cdot [\dot{w}(t - X'(\beta - \beta_0)) + \dot{g}(t - X'(\beta - \beta_0))w(t - X'(\beta - \beta_0))] dt \right\}, \\
& \ddot{l}_{\zeta\zeta}(\beta, \zeta(\cdot, \beta); Z)[h_1(\cdot, \beta), h_2(\cdot, \beta)] \\
& = - \int_a^b 1(\epsilon_0 \geq t) \exp\{g(t - X'(\beta - \beta_0))\} \\
& \quad \cdot w_1(t - X'(\beta - \beta_0))w_2(t - X'(\beta - \beta_0)) dt,
\end{aligned}$$

where  $h \in \mathbb{H} = \{h : h(\cdot, \beta) = \frac{\partial \zeta_\eta(\cdot, \beta)}{\partial \eta}|_{\eta=0} = w(\psi(\cdot, \beta)), \zeta_\eta \in \mathcal{H}^p\}$ . All the above derivatives are continuous and bounded by Conditions (C.1)-(C.3) and (C.6).

1.2. *Proof of Lemma 7.2.* This is a direct result of Corollary 6.21 in [2], that is, there exists a  $g_{0,n} \in \mathcal{G}_n^p$  such that  $\zeta_{0,n}(t, x, \beta_0) = g_{0,n}(t)$  and

$$\|\zeta_{0,n}(\cdot, \beta_0) - \zeta_0(\cdot, \beta_0)\|_\infty = \|g_{0,n} - g_0\|_\infty = O(q_n^{-p}) = O(n^{-p\nu}).$$

1.3. *Proof of Lemma 7.3.* By the calculation in [3] on page 597, denote the ceiling of  $x$  by  $\lceil x \rceil$ , then for any  $\varepsilon > 0$ , there exists a set of brackets  $\{[g_i^L, g_i^U] : i = 1, 2, \dots, \lceil (1/\varepsilon)^{c_1 q_n} \rceil\}$  such that for any  $g \in \mathcal{G}_n^p$ ,  $g_i^L(t) \leq g(t) \leq g_i^U(t)$  for some  $1 \leq i \leq \lceil (1/\varepsilon)^{c_1 q_n} \rceil$  and all  $t \in [a, b]$ , where  $\|g_i^U - g_i^L\|_\infty \leq \varepsilon$ . Since  $\mathcal{B} \subseteq \mathbb{R}^d$  is compact,  $\mathcal{B}$  can be covered by  $\lceil c_2(1/\varepsilon)^d \rceil$  balls with radius  $\varepsilon$ ; that is, for any  $\beta \in \mathcal{B}$ , there exist  $\beta_s$ ,  $1 \leq s \leq \lceil c_2(1/\varepsilon)^d \rceil$ , such that  $|\beta - \beta_s| \leq \varepsilon$ , i.e.,  $|(\beta - \beta_0) - (\beta_s - \beta_0)| \leq \varepsilon$ , and hence  $|x'(\beta - \beta_0) - x'(\beta_s - \beta_0)| \leq C\varepsilon$  for any  $x \in \mathcal{X}$  because of Condition (C.2)(a), where  $C > 0$  is a constant. This indicates that  $t - x'(\beta - \beta_0) \in [t - x'(\beta_s - \beta_0) - C\varepsilon, t - x'(\beta_s - \beta_0) + C\varepsilon]$  for any  $x$  and  $t$ . Assume  $g_i^L(t - x'(\beta_s - \beta_0) + c_1^{i,t}\varepsilon)$  and  $g_i^U(t - x'(\beta_s - \beta_0) + c_2^{i,t}\varepsilon)$  are the minimum and maximum values of  $g_i^L$  and  $g_i^U$  within the interval  $[t - x'(\beta_s - \beta_0) - C\varepsilon, t - x'(\beta_s - \beta_0) + C\varepsilon]$ , where  $c_1^{i,t}$  and  $c_2^{i,t}$  are two constants that only depend on  $g_i^L$ ,  $g_i^U$  and  $t$  with  $|c_1^{i,t}|, |c_2^{i,t}| \leq C$ . So we have

$$\begin{aligned}
& g_i^L(t - x'(\beta_s - \beta_0) + c_1^{i,t}\varepsilon) \leq g_i^L(t - x'(\beta - \beta_0)) \\
& \leq g(t - x'(\beta - \beta_0)) \leq g_i^U(t - x'(\beta - \beta_0)) \\
& \leq g_i^U(t - x'(\beta_s - \beta_0) + c_2^{i,t}\varepsilon).
\end{aligned}$$

Hence we can construct a set of brackets

$$\{[m_{i,s}^L(Z), m_{i,s}^U(Z)] : i = 1, \dots, \lceil (1/\varepsilon)^{c_1 q_n} \rceil; s = 1, \dots, \lceil c_2(1/\varepsilon)^d \rceil\}$$

such that for any  $m(\theta; Z) \in \mathcal{F}_n$ , there exists a pair  $(i, s)$  such that for any sample point  $Z$ ,  $m(\theta; Z) \in [m_{i,s}^L(Z), m_{i,s}^U(Z)]$ , where

$$\begin{aligned} m_{i,s}^L(Z) &= \left\{ \Delta g_i^L(\epsilon_0 - X'(\beta_s - \beta_0) + c_1^{i,\epsilon_0} \epsilon) \right. \\ &\quad \left. - \int_a^b 1(\epsilon_0 \geq t) \exp\{g_i^U(t - x'(\beta_s - \beta_0) + c_2^{i,t} \epsilon)\} dt \right\} \\ &\quad - l(\theta_{0,n}; Z), \end{aligned}$$

and

$$\begin{aligned} m_{i,s}^U(Z) &= \left\{ \Delta g_i^U(\epsilon_0 - X'(\beta_s - \beta_0) + c_2^{i,\epsilon_0} \epsilon) \right. \\ &\quad \left. - \int_a^b 1(\epsilon_0 \geq t) \exp\{g_i^L(t - x'(\beta_s - \beta_0) + c_1^{i,t} \epsilon)\} dt \right\} \\ &\quad - l(\theta_{0,n}; Z). \end{aligned}$$

It then follows that

$$\begin{aligned} &|m_{i,s}^U(Z) - m_{i,s}^L(Z)| \\ &\leq |g_i^U(\epsilon_0 - X'(\beta_s - \beta_0) + c_2^{i,\epsilon_0} \epsilon) - g_i^L(\epsilon_0 - X'(\beta_s - \beta_0) + c_1^{i,\epsilon_0} \epsilon)| \\ &\quad + \int_a^b |\exp\{g_i^U(t - X'(\beta_s - \beta_0) + c_2^{i,t} \epsilon)\} \\ &\quad \quad - \exp\{g_i^L(t - x'(\beta_s - \beta_0) + c_1^{i,t} \epsilon)\}| dt \\ &= A_1 + A_2. \end{aligned}$$

For  $A_1$ , by subtracting and adding the terms  $g(\epsilon_0 - X'(\beta_s - \beta_0) + c_2^{i,\epsilon_0} \epsilon)$  and  $g(\epsilon_0 - X'(\beta_s - \beta_0) + c_1^{i,\epsilon_0} \epsilon)$  and applying the Taylor expansion to  $g$  at  $\epsilon_0 - X'(\beta_s - \beta_0) + c_1^{i,\epsilon_0} \epsilon$ , we have

$$\begin{aligned} A_1 &\leq |g_i^U(\epsilon_0 - X'(\beta_s - \beta_0) + c_2^{i,\epsilon_0} \epsilon) - g(\epsilon_0 - X'(\beta_s - \beta_0) + c_2^{i,\epsilon_0} \epsilon)| \\ &\quad + |g(\epsilon_0 - X'(\beta_s - \beta_0) + c_2^{i,\epsilon_0} \epsilon) - g(\epsilon_0 - X'(\beta_s - \beta_0) + c_1^{i,\epsilon_0} \epsilon)| \\ &\quad + |g(\epsilon_0 - X'(\beta_s - \beta_0) + c_1^{i,\epsilon_0} \epsilon) - g_i^L(\epsilon_0 - X'(\beta_s - \beta_0) + c_1^{i,\epsilon_0} \epsilon)| \\ &\leq \|g_i^U - g\|_\infty + |\dot{g}(\epsilon_0 - X'(\beta_s - \beta_0) + \tilde{c}\epsilon)(c_2^{i,\epsilon_0} - c_1^{i,\epsilon_0})\epsilon| + \|g - g_i^L\|_\infty \\ &\leq \|g_i^U - g_i^L\|_\infty + C_1|(c_2^{i,\epsilon_0} - c_1^{i,\epsilon_0})\epsilon| + \|g_i^U - g_i^L\|_\infty \\ &\leq 2\epsilon + 2C_1C_2\epsilon \lesssim \epsilon, \end{aligned}$$

where the third inequality holds because  $\|g_i^U - g\|_\infty, \|g - g_i^L\|_\infty \leq \|g_i^U - g_i^L\|_\infty$  and  $\dot{g}$  is bounded by  $C_1$ . The Constant  $C_1$  may be proportional to  $c_n$  that

is allowed to grow with  $n$  slowly enough, but it does not affect the later calculations on convergence rate (see [3], page 591, for their constant  $l_n$ ), thus we drop  $c_n$  for simplicity. For  $A_2$ , by using the similar arguments as for  $A_1$  and denote  $t - X'(\beta_s - \beta_0) = t_s$  for notational simplicity, we have

$$\begin{aligned}
A_2 &\leq \int_a^b \{ |\exp\{g_i^U(t_s + c_2^{i,t}\varepsilon)\} - \exp\{g(t_s + c_2^{i,t}\varepsilon)\}| \\
&\quad + |\exp\{g(t_s + c_2^{i,t}\varepsilon)\} - \exp\{g(t_s + c_1^{i,t}\varepsilon)\}| \\
&\quad + |\exp\{g(t_s + c_1^{i,t}\varepsilon)\} - \exp\{g_i^L(t_s + c_1^{i,t}\varepsilon)\}| \} dt \\
&= \int_a^b \{ |\exp\{\tilde{g}_i^U(t_s + c_2^{i,t}\varepsilon)\}(g_i^U - g)(t_s + c_2^{i,t}\varepsilon)| \\
&\quad + |\exp\{g(t_s + \tilde{c}\varepsilon)\}(c_2^{i,t} - c_1^{i,t})\varepsilon| \\
&\quad + |\exp\{\tilde{g}_i^L(t_s + c_1^{i,t}\varepsilon)\}(g_i^L - g)(t_s + c_1^{i,t}\varepsilon)| \} dt \\
&\lesssim \|g_i^U - g\|_\infty + |(c_2^{i,t} - c_1^{i,t})\varepsilon| + \|g - g_i^L\|_\infty \lesssim \varepsilon.
\end{aligned}$$

The above equality is from Taylor expansion, where  $\tilde{g}_i^U = g + \xi(g_i^U - g)$  for some  $0 < \xi < 1$  and thus  $|\tilde{g}_i^U(\cdot)| \leq |g(\cdot)| + \varepsilon$ , which is bounded in  $[a, b]$ ; similarly  $|\tilde{g}_i^L|$  is also bounded in  $[a, b]$ . Hence  $\|m_i^U - m_i^L\|_\infty \lesssim \varepsilon$  and the  $\varepsilon$ -bracketing number associated with  $\|\cdot\|_\infty$  norm for the class  $\mathcal{F}_n$  follows

$$N_{[]}(\varepsilon, \mathcal{F}_n, \|\cdot\|_\infty) \leq (1/\varepsilon)^{c_1 q_n} c_2 (1/\varepsilon)^d \lesssim (1/\varepsilon)^{c_1 q_n + d}.$$

1.4. *Proof of Lemma 7.4.* In the proof of Theorem 4.2 in the main text of the paper we show that such defined  $(h_1^*, \dots, h_d^*)$  determines the least favorable submodel for  $\beta$ . Now, by Conditions (C.4)-(C.5), the following conditional density of  $\epsilon_0$  given  $X$

$$f_{\epsilon_0|X}(t|X = x) = f(t)\bar{G}_{C|X}(t + x'\beta_0|X = x) + g_{C|X}(t + x'\beta_0|X = x)\bar{F}(t)$$

is uniformly bounded for all  $x \in \mathcal{X}$ , and its derivative with respect to  $t$

$$\begin{aligned}
&\dot{f}_{\epsilon_0|X}(t|X = x) \\
&= \dot{f}(t)\bar{G}_{C|X}(t + x'\beta_0|X = x) - f(t)g_{C|X}(t + x'\beta_0|X = x) \\
&\quad + \dot{g}_{C|X}(t + x'\beta_0|X = x)\bar{F}(t) - g_{C|X}(t + x'\beta_0|X = x)f(t)
\end{aligned}$$

is also uniformly bounded. Hence the density of  $\epsilon_0$

$$f_{\epsilon_0}(t) = \int_{\mathcal{X}} f_{\epsilon_0|X}(t|X = x)f_X(x) dx$$

and its derivative

$$\dot{f}_{\epsilon_0}(t) = \int_{\mathcal{X}} \dot{f}_{\epsilon_0|X}(t|X=x) f_X(x) dx$$

are bounded. Thus the first and second derivatives of  $P(\epsilon_0 \geq t)$ , i.e.,  $-f_{\epsilon_0}(t)$  and  $-\dot{f}_{\epsilon_0}(t)$ , are both bounded. In addition, under Condition (C.2)(a), the first and second derivatives of  $P[X1(\epsilon_0 \geq t)]$  with respect to  $t$

$$\frac{dP[X1(\epsilon_0 \geq t)]}{dt} = - \int_{\mathcal{X}} x f_X(x) f_{\epsilon_0|X}(t|X=x) dx$$

and

$$\frac{d^2P[X1(\epsilon_0 \geq t)]}{dt^2} = - \int_{\mathcal{X}} x f_X(x) \dot{f}_{\epsilon_0|X}(t|X=x) dx$$

are also bounded. Therefore,  $P[X|\epsilon_0 \geq t] = P[X1(\epsilon_0 \geq t)]/P(\epsilon_0 \geq t)$  has a bounded second derivative with respect to  $t$  for  $t \leq \tau$ , where  $\tau$  is the truncation time defined in Condition (C.3). Thus  $P[X|\epsilon_0 \geq t] \in \mathcal{G}^2$ . Moreover, since  $g_0 \in \mathcal{G}^p$  for  $p \geq 3$ , we have  $\dot{g}_0 \in \mathcal{G}^{p-1}$  with  $p-1 \geq 2$ . Thus according to Corollary 6.21 of [2], there exists an  $h_{j,n}^* \in \mathcal{H}_n^{\min(p-1,2)} = \mathcal{H}_n^2$  such that  $h_{j,n}^*(t, x, \beta_0) = w_{j,n}^*(\psi(t, x, \beta_0)) = w_{j,n}^*(t)$  and  $\|h_{j,n}^*(\cdot, \beta_0) - h_j^*(\cdot, \beta_0)\|_\infty = \|w_{j,n}^* - w_j^*\|_\infty = O(q_n^{-2}) = O(n^{-2\nu})$ .

1.5. *Proof of Lemma 7.5.* The proof is similar to the bracketing number calculation in Lemma 7.3, thus omitted. We refer all the details to [1].

1.6. *Proof of Lemma 7.6.* The proof is also similar to the bracketing number calculation in Lemma 7.3, thus omitted. We again refer all the details to [1].

**2. Proof of Theorem 4.1.** We shall apply Theorem 1 of [3] to derive the convergence rate. We proceed by verifying their conditions C1-C3. Since  $Pl(\beta, \zeta(\cdot, \beta); Z)$  is maximized at  $(\beta_0, \zeta_0(\cdot, \beta_0))$ , its first derivatives at  $(\beta_0, \zeta_0(\cdot, \beta_0))$  are equal to 0. By Lemma 7.1 that all the second derivatives of  $l(\beta, \zeta(\cdot, \beta); Z)$  are continuous and bounded, the Taylor expansion yields

$$\begin{aligned} (2.1) \quad & Pl(\beta, \zeta(\cdot, \beta); Z) - Pl(\beta_0, \zeta_0(\cdot, \beta_0); Z) \\ &= \frac{1}{2} P \{ (\beta - \beta_0)' \ddot{l}_{\beta\beta}(\beta_0, \zeta_0(\cdot, \beta_0); Z) (\beta - \beta_0) \\ &\quad + 2(\beta - \beta_0)' \ddot{l}_{\beta\zeta}(\beta_0, \zeta_0(\cdot, \beta_0); Z) [\zeta(\cdot, \beta) - \zeta_0(\cdot, \beta_0)] \\ &\quad + \ddot{l}_{\zeta\zeta}(\beta_0, \zeta_0(\cdot, \beta_0); Z) [\zeta(\cdot, \beta) - \zeta_0(\cdot, \beta_0), \zeta(\cdot, \beta) - \zeta_0(\cdot, \beta_0)] \} \\ &\quad + o(d^2(\theta, \theta_0)) \\ &= A + o(d^2(\theta, \theta_0)), \end{aligned}$$

where  $\theta = (\beta, \zeta(\cdot, \beta)) \in \Theta_n^p$ . By the model assumption, we have that the conditional expectation  $P\{\dot{l}_\zeta(\beta_0, \zeta_0(\cdot, \beta_0); Z)[h(\cdot, \beta_0)]|X\} = 0$  for all  $h \in \mathbb{H}$ . Taking  $h$  to be  $\ddot{g}_0$  and  $\dot{g}(\psi(\cdot, \beta)) - \dot{g}_0(\psi(\cdot, \beta_0))$  respectively, we have

$$P\left\{\Delta\ddot{g}_0(\epsilon_0) - \int_a^b 1(\epsilon_0 \geq t) \exp\{g_0(t)\} \ddot{g}_0(t) dt \middle| X\right\} = 0$$

and

$$P\left\{\Delta[\dot{g}(\epsilon_0 - X'(\beta - \beta_0)) - \dot{g}_0(\epsilon_0)] - \int_a^b 1(\epsilon_0 \geq t) \exp\{g_0(t)\} [\dot{g}(t - X'(\beta - \beta_0)) - \dot{g}_0(t)] dt \middle| X\right\} = 0.$$

Then it follows

$$\begin{aligned} A &= P\left\{\frac{1}{2} \int_a^b 1(\epsilon_0 \geq t) \exp\{g_0(t)\} \{-[\dot{g}_0(t)X'(\beta - \beta_0)]^2 + 2\dot{g}_0(t)X'(\beta - \beta_0)[g(t - X'(\beta - \beta_0)) - g_0(t)] - [g(t - X'(\beta - \beta_0)) - g_0(t)]^2\} dt\right\} \\ (2.2) \quad &= -\frac{1}{2} \int_a^b \exp\{g_0(t)\} P\{1(\epsilon_0 \geq t)[\dot{g}_0(t)X'(\beta - \beta_0) - (g(t_\beta) - g_0(t))]^2\} dt, \end{aligned}$$

where  $t_\beta = t - X'(\beta - \beta_0)$ . The integrand is from  $a$  to  $\tau = b$  because of Condition (C.3) and (C.6). Denote  $s_0(t) = -\dot{g}_0(t)$ ,  $s_1(t; \epsilon_0, X) = 1(\epsilon_0 \geq t)X'(\beta - \beta_0)$ , and  $s_2(t; \epsilon_0, X) = 1(\epsilon_0 \geq t)[g(t_\beta) - g_0(t)]$ , then

$$\begin{aligned} &P\{1(\epsilon_0 \geq t)[\dot{g}_0(t)X'(\beta - \beta_0) - (g(t_\beta) - g_0(t))]^2\} \\ &= P\{[s_0(t)s_1(t; \epsilon_0, X) + s_2(t; \epsilon_0, X)]^2\} \\ &\geq s_0^2(t)P[s_1^2(t; \epsilon_0, X)] + P[s_2^2(t; \epsilon_0, X)] \\ &\quad - 2|s_0(t)P[s_1(t; \epsilon_0, X)s_2(t; \epsilon_0, X)]| \\ (2.3) \quad &\geq s_0^2(t)P[s_1^2(t; \epsilon_0, X)] + P[s_2^2(t; \epsilon_0, X)] \\ &\quad - (1 - \eta)^{\frac{1}{2}} \cdot 2|s_0(t)[P(s_1^2(t; \epsilon_0, X))]^{\frac{1}{2}}| \cdot |[P(s_2^2(t; \epsilon_0, X))]^{\frac{1}{2}}| \\ &\geq \{1 - (1 - \eta)^{\frac{1}{2}}\} \{s_0^2(t)P(s_1^2(t; \epsilon_0, X)) + P(s_2^2(t; \epsilon_0, X))\} \\ &\gtrsim \dot{g}_0^2(t)(\beta - \beta_0)' P[1(\epsilon_0 \geq t)XX'](\beta - \beta_0) \\ &\quad + P[1(\epsilon_0 \geq t)(g(t_\beta) - g_0(t))^2], \end{aligned}$$

where (2.3) is obtained by using the same argument in [4] on page 2126, which is, under Condition (C.7),  $[P(s_1 s_2)]^2 \leq (1 - \eta)P(s_1^2)P(s_2^2)$  for some  $\eta \in (0, 1)$ . Hence from (2.2) we have

$$\begin{aligned} A &\lesssim -\left\{(\beta - \beta_0)' \left[ \int_a^b \exp\{g_0(t)\} \dot{g}_0^2(t) P[1(\epsilon_0 \geq t) X X'] dt \right] (\beta - \beta_0) \right. \\ &\quad \left. + \int_a^b \exp\{g_0(t)\} P[1(\epsilon_0 \geq t) (g(t_\beta) - g_0(t))^2] dt \right\} \\ &= -(A_1 + A_2). \end{aligned}$$

For  $A_1$ , Condition (C.3) implies that

$$P[1(\epsilon_0 \geq t) X X'] = P[X X' P(\epsilon_0 \geq t | X)] \geq P[X X' P(\epsilon_0 \geq \tau | X)] \geq \delta P(X X').$$

Then Condition (C.2)(b) yields that  $P(X X')$  is positive definite and thus its smallest eigenvalue  $\lambda_1 > 0$ . In addition,  $\int_a^b \exp\{g_0(t)\} \dot{g}_0^2(t) dt$  is bounded away from zero since  $\exp\{g_0(t)\}, \dot{g}_0^2(t) \geq 0$  but not a constant zero on  $t \in [a, b]$ . Hence it follows that

$$A_1 \gtrsim (\beta - \beta_0)' P(X X') (\beta - \beta_0) \geq \lambda_1 |\beta - \beta_0|^2 \gtrsim |\beta - \beta_0|^2.$$

For  $A_2$ , Condition (C.3) yields

$$\begin{aligned} A_2 &\geq P(\epsilon_0 \geq b) \int_a^b P(g(t - X'(\beta - \beta_0)) - g_0(t))^2 d\Lambda_0(t) \\ &\gtrsim \|\zeta(\cdot, \beta) - \zeta_0(\cdot, \beta_0)\|_2^2. \end{aligned}$$

Therefore

$$A \lesssim -\{|\beta - \beta_0|^2 + \|\zeta(\cdot, \beta) - \zeta_0(\cdot, \beta_0)\|_2^2\} = -d^2(\theta, \theta_0),$$

and thus from (2.1),

$$Pl(\beta, \zeta(\cdot, \beta); Z) - Pl(\beta_0, \zeta_0(\cdot, \beta_0); Z) \lesssim -d^2(\theta, \theta_0) + o(d^2(\theta, \theta_0)) \lesssim -d^2(\theta, \theta_0),$$

i.e.  $P(l(\theta_0; Z) - l(\theta; Z)) \gtrsim d^2(\theta, \theta_0)$  for all  $\theta \in \Theta_n^p$ , which implies that

$$\inf_{\{d(\theta, \theta_0) \geq \varepsilon, \theta \in \Theta_n^p\}} P(l(\theta_0; Z) - l(\theta; Z)) \gtrsim \varepsilon^2.$$

Hence condition C1 of [3] on page 583 holds with the constant  $\alpha = 1$  in their notation.

Next we verify condition C2 of [3]. Denote  $\epsilon_\beta = Y - X'\beta$ . It follows that

$$\begin{aligned}
& [l(\theta; Z) - l(\theta_0; Z)]^2 \\
&= \left\{ \Delta g(\epsilon_\beta) - \int_a^b 1(\epsilon_0 \geq t) e^{g(t_\beta)} dt - \Delta g_0(\epsilon_0) + \int_a^b 1(\epsilon_0 \geq t) e^{g_0(t)} dt \right\}^2 \\
&\lesssim \Delta [g(\epsilon_\beta) - g_0(\epsilon_0)]^2 + \left\{ \int_a^b 1(\epsilon_0 \geq t) [e^{g(t_\beta)} - e^{g_0(t)}] dt \right\}^2 \\
&\lesssim \Delta [g(\epsilon_\beta) - g_0(\epsilon_0)]^2 + \int_a^b [e^{g(t_\beta)} - e^{g_0(t)}]^2 dt \\
&\lesssim \Delta [g(\epsilon_\beta) - g(\epsilon_0)]^2 + \Delta [g(\epsilon_0) - g_0(\epsilon_0)]^2 \\
&\quad + \int_a^b [e^{g(t_\beta)} - e^{g(t)}]^2 dt + \int_a^b [e^{g(t)} - e^{g_0(t)}]^2 dt \\
&= I_1 + I_2 + I_3 + I_4,
\end{aligned}$$

where the second inequality holds because of the Cauchy-Schwartz inequality

$$\begin{aligned}
& \left\{ \int_a^b 1(\epsilon_0 \geq t) [e^{g(t_\beta)} - e^{g_0(t)}] dt \right\}^2 \\
&\leq \left\{ \int_a^b 1(\epsilon_0 \geq t) dt \right\} \left\{ \int_a^b [e^{g(t_\beta)} - e^{g_0(t)}]^2 dt \right\} \\
&\leq (b-a) \int_a^b [e^{g(t_\beta)} - e^{g_0(t)}]^2 dt,
\end{aligned}$$

and the third inequality holds by subtracting and adding the terms  $g(\epsilon_0)$  and  $e^{g(t)}$ . For  $I_1$ , since  $\dot{g} \in \mathcal{G}_n^{p-1}$  is bounded, applying the Taylor expansion for  $g$  at  $\epsilon_0$  we obtain

$$\begin{aligned}
PI_1 &= P\{\Delta[g(\epsilon_0 - X'(\beta - \beta_0)) - g(\epsilon_0)]^2\} \\
&\leq P[\dot{g}(\epsilon_0 - X'(\tilde{\beta} - \beta_0))X'(\beta - \beta_0)]^2 \\
&\lesssim P[X'(\beta - \beta_0)]^2 = (\beta - \beta_0)'P(XX')(\beta - \beta_0) \\
&\leq \lambda_d |\beta - \beta_0|^2 \lesssim |\beta - \beta_0|^2,
\end{aligned}$$

where  $\lambda_d$  is the largest eigenvalue of  $P(XX')$ . For  $I_2$ , since the density function for  $(Y, \Delta = 1, X)$  is

$$f_{Y, \Delta, X}(y, 1, x) = \lambda_0(y - x'\beta_0) e^{-\Lambda_0(y - x'\beta_0)} \bar{G}_{C|X}(y|X = x) f_X(x),$$



it follows that

$$\begin{aligned}
PI_2 &= P[\Delta(g - g_0)^2(\epsilon_0)] \\
&= \int_{\mathcal{X}} \left\{ \int_a^b (g(t) - g_0(t))^2 \lambda_0(t) e^{-\Lambda_0(t)} \bar{G}_{C|X}(t + x'\beta_0 | X = x) dt \right\} \\
&\quad f_X(x) dx \\
&\leq \int_{\mathcal{X}} \left\{ \int_a^b (g(t) - g_0(t))^2 d\Lambda_0(t) \right\} f_X(x) dx \\
&= \|\zeta(\cdot, \beta_0) - \zeta_0(\cdot, \beta_0)\|_2^2.
\end{aligned}$$

Then for  $I_3$ , since  $g \in \mathcal{G}_n^p$  is bounded, it follows that

$$\begin{aligned}
PI_3 &= P \int_a^b [e^{g(t - X'(\beta - \beta_0))} - e^{g(t)}]^2 dt \\
&= P \int_a^b e^{2g(t - X'(\tilde{\beta} - \beta_0))} [X'(\beta - \beta_0)]^2 dt \\
&\lesssim \int_a^b P[X'(\beta - \beta_0)]^2 dt \\
&\lesssim (\beta - \beta_0)' P[XX'](\beta - \beta_0) \lesssim |\beta - \beta_0|^2.
\end{aligned}$$

Finally for  $I_4$ , by the Taylor expansion for  $e^{g(t)}$  at  $g_0$ , we have

$$\begin{aligned}
PI_4 &= \int_a^b [e^{g(t)} - e^{g_0(t)}]^2 dt \\
&\leq \int_a^b e^{2\tilde{g}(t)} (g(t) - g_0(t))^2 dt \\
&= \int_a^b e^{2\tilde{g}(t) - g_0(t)} (g(t) - g_0(t))^2 d\Lambda_0(t) \\
&\lesssim \int_a^b (g(t) - g_0(t))^2 d\Lambda_0(t) = \|\zeta(\cdot, \beta_0) - \zeta_0(\cdot, \beta_0)\|_2^2,
\end{aligned}$$

where  $\tilde{g}(t) = g_0(t) + \xi(g - g_0)(t)$  for some  $0 < \xi < 1$  and hence is bounded. Since  $\|\zeta(\cdot, \beta_0) - \zeta_0(\cdot, \beta_0)\|_2 \leq \|\zeta(\cdot, \beta) - \zeta(\cdot, \beta_0)\|_2 + \|\zeta(\cdot, \beta) - \zeta_0(\cdot, \beta_0)\|_2 \lesssim |\beta - \beta_0| + \|\zeta(\cdot, \beta) - \zeta_0(\cdot, \beta_0)\|_2$ , we have

$$P(l(\theta; Z) - l(\theta_0; Z))^2 \lesssim |\beta - \beta_0|^2 + \|\zeta(\cdot, \beta) - \zeta_0(\cdot, \beta_0)\|_2^2 = d^2(\theta, \theta_0)$$

for any  $\theta \in \Theta_n^p$ , which implies that

$$\begin{aligned}
&\sup_{\{d(\theta, \theta_0) \leq \varepsilon, \theta \in \Theta_n^p\}} \text{Var}(l(\theta_0; Z) - l(\theta; Z)) \\
&\leq \sup_{\{d(\theta, \theta_0) \leq \varepsilon, \theta \in \Theta_n^p\}} P(l(\theta_0; Z) - l(\theta; Z))^2 \lesssim \varepsilon^2.
\end{aligned}$$

So condition C2 of [3] on page 583 holds with the constant  $\beta = 1$  in their notation.

Finally, we verify condition C3 of [3]. By lemma 7.3, for  $\mathcal{F}_n = \{l(\theta; Z) - l(\theta_{0,n}; Z) : \theta \in \Theta_n^p\}$ , we have  $N_{[]}(\varepsilon, \mathcal{F}_n, \|\cdot\|_\infty) \lesssim (1/\varepsilon)^{cq_n+d}$ . Then by the fact that the covering number is bounded by the bracketing number, it follows that

$$H(\varepsilon, \mathcal{F}_n, \|\cdot\|_\infty) = \log N(\varepsilon, \mathcal{F}_n, \|\cdot\|_\infty) \lesssim (cq_n + d) \log(1/\varepsilon) \lesssim n^\nu \log(1/\varepsilon).$$

So condition C3 of [3] on page 583 holds with the constants  $2r_0 = \nu$  and  $r = 0^+$  in their notation.

Therefore, the constant  $\tau$  in Theorem 1 of [3] on page 584 is  $\frac{1-\nu}{2} - \frac{\log \log n}{2 \log n}$ . Since  $\frac{\log \log n}{2 \log n} \rightarrow 0$  as  $n \rightarrow 0$ , we can pick a  $\tilde{\nu}$  slightly greater than  $\nu$  such that  $\frac{1-\tilde{\nu}}{2} \leq \frac{1-\nu}{2} - \frac{\log \log n}{2 \log n}$  for  $n$  large. We still denote  $\tilde{\nu}$  by  $\nu$  and then  $\tau = \frac{1-\nu}{2}$ . Since  $\hat{\theta}_n$  maximizes the empirical log-likelihood  $\mathbb{P}_n l(\theta; Z)$  over the sieve space  $\Theta_n^p$ , we have that  $\hat{\theta}_n$  satisfies inequality (1.1) in [3] with  $\eta_n = 0$ . By Lemma 7.2, there exists an  $\zeta_{0,n}(\cdot, \beta_0) \in \mathcal{H}_n^p$  such that  $\|\zeta_{0,n}(\cdot, \beta_0) - \zeta_0(\cdot, \beta_0)\|_\infty = O(n^{-p\nu})$ . Moreover, by the Taylor expansion for  $P[l(\beta_0, \zeta_0(\cdot, \beta_0); Z) - l(\beta, \zeta(\cdot, \beta); Z)]$  in (2.1) and plugging in  $\theta = \theta_{0,n} = (\beta_0, \zeta_{0,n}(\cdot, \beta_0))$ , the Kullback-Leibler distance between  $\theta_{0,n} = (\beta_0, \zeta_{0,n}(\cdot, \beta_0))$  and  $\theta_0 = (\beta_0, \zeta_0(\cdot, \beta_0))$  is given as

$$\begin{aligned} & K(\theta_{0,n}, \theta_0) \\ &= P[l(\theta_0; Z) - l(\theta_{0,n}; Z)] \\ &= -P\{\ddot{l}_{\zeta\zeta}(\beta_0, \zeta_0(\cdot, \beta_0); Z)[\zeta_{0,n}(\cdot, \beta_0) - \zeta_0(\cdot, \beta_0), \zeta_{0,n}(\cdot, \beta_0) - \zeta_0(\cdot, \beta_0)]\} \\ &\quad + o(\|\zeta_{0,n}(\cdot, \beta_0) - \zeta_0(\cdot, \beta_0)\|_2^2) \\ &= P\left\{\int_a^b 1(\epsilon_0 \geq t) \exp\{g_0(t)\} (g_{0,n}(t) - g_0(t))^2 dt\right\} \\ &\quad + o(\|\zeta_{0,n}(\cdot, \beta_0) - \zeta_0(\cdot, \beta_0)\|_2^2) \\ &\leq \int_a^b (g_{0,n}(t) - g_0(t))^2 d\Lambda_0(t) + o(\|\zeta_{0,n}(\cdot, \beta_0) - \zeta_0(\cdot, \beta_0)\|_2^2) \\ &= \|\zeta_{0,n}(\cdot, \beta_0) - \zeta_0(\cdot, \beta_0)\|_2^2 + o(\|\zeta_{0,n}(\cdot, \beta_0) - \zeta_0(\cdot, \beta_0)\|_2^2) = O(n^{-2p\nu}), \end{aligned}$$

where the last equality holds because  $\|\zeta_{0,n}(\cdot, \beta_0) - \zeta_0(\cdot, \beta_0)\|_2 \leq \|\zeta_{0,n}(\cdot, \beta_0) - \zeta_0(\cdot, \beta_0)\|_\infty = O(n^{-p\nu})$ . Therefore  $K^{1/2}(\theta_{0,n}, \theta_0) = O(n^{-p\nu})$ . Thus by Theorem 1 of [3], we obtain the convergence rate for  $\hat{\theta}_n$  as follows

$$d(\hat{\theta}_n, \theta_0) = O_p\{\max(n^{-(1-\nu)/2}, n^{-p\nu}, n^{-p\nu})\} = O_p\{n^{-\min(p\nu, (1-\nu)/2)}\}.$$

**3. Proof of Theorem 4.3.** Define  $\mathbf{w}_n^*(t) = -\hat{g}_n(t)\bar{X}(t; \hat{\beta}_n)$ . Then we have

$$l_{\hat{\beta}_n}^*(Y, \Delta, X) = \dot{l}_{\beta}(\hat{\theta}_n; Z) - \dot{l}_{\zeta}(\hat{\theta}_n; Z)[\mathbf{h}_n^*].$$

Define

$$\begin{aligned} I^{jk}(\beta_0) &= P \left[ \left\{ \dot{l}_{\beta_j}(\theta_0; Z) - \dot{l}_{\zeta}(\theta_0; Z)[h_j^*] \right\} \right. \\ &\quad \left. \times \left\{ \dot{l}_{\beta_k}(\theta_0; Z) - \dot{l}_{\zeta}(\theta_0; Z)[h_k^*] \right\} \right] \equiv PA^{jk}(\theta_0; Z), \\ \hat{I}_n^{jk}(\hat{\beta}_n) &= \mathbb{P}_n \left[ \left\{ \dot{l}_{\beta_j}(\hat{\theta}_n; Z) - \dot{l}_{\zeta}(\hat{\theta}_n; Z)[h_{j,n}^*] \right\} \right. \\ &\quad \left. \times \left\{ \dot{l}_{\beta_k}(\hat{\theta}_n; Z) - \dot{l}_{\zeta}(\hat{\theta}_n; Z)[h_{k,n}^*] \right\} \right] \equiv \mathbb{P}_n A_n^{jk}(\hat{\theta}_n; Z), \end{aligned}$$

where  $h_j^*$  is defined in Lemma 7.4, see also Equation (7.1) in the main text. We will prove  $\mathbb{P}_n A_n^{jk}(\hat{\theta}_n; Z) \rightarrow PA^{jk}(\theta_0; Z)$  in probability for all  $j, k = 1, \dots, d$ . Let

$$\begin{aligned} \mathbb{P}_n A_n^{jk}(\hat{\theta}_n; Z) - PA^{jk}(\theta_0; Z) &= (\mathbb{P}_n - P)A_n^{jk}(\hat{\theta}_n; Z) \\ &\quad + P \left\{ A_n^{jk}(\hat{\theta}_n; Z) - A^{jk}(\theta_0; Z) \right\} \\ &= I_{1n} + I_{2n}. \end{aligned}$$

For  $I_{1n}$ , we first define the class of functions

$$\begin{aligned} \mathcal{F}_{n,j}^{\beta, \zeta}(\eta) &= \{ \dot{l}_{\beta_j}(\theta; z) - \dot{l}_{\zeta}(\theta; z)[h_j] : \theta \in \Theta_n^p, d(\theta, \theta_0) \leq \eta, h_j \in \mathcal{H}_n^2, \\ &\quad \| \dot{g}(\psi(\cdot, \beta)) - \dot{g}_0(\psi(\cdot, \beta_0)) \|_2 \leq \eta, \| h_j - h_j^* \|_{\infty} \leq \eta \}. \end{aligned}$$

Then by Lemmas 7.5 and 7.6 we have

$$N_{[]}(\varepsilon, \mathcal{F}_{n,j}^{\beta, \zeta}, \| \cdot \|_{\infty}) \lesssim (1/\varepsilon)^{cq_n+d}$$

for some constant  $c > 0$ . This is because for any function  $\dot{l}_{\beta_j}(\theta; z) - \dot{l}_{\zeta}(\theta; z)[h_j] \in \mathcal{F}_{n,j}^{\beta, \zeta}(\eta)$ , it can be written as

$$\begin{aligned} &\dot{l}_{\beta_j}(\theta; z) - \dot{l}_{\zeta}(\theta; z)[h_j] \\ &= \{ \dot{l}_{\beta_j}(\theta; z) - \dot{l}_{\beta_j}(\theta_0; z) \} - \{ \dot{l}_{\zeta}(\theta; z)[h_j^*] - \dot{l}_{\zeta}(\theta_0; z)[h_j^*] \} \\ &\quad + \{ \dot{l}_{\zeta}(\theta; z)[h_j^*] - \dot{l}_{\zeta}(\theta; z)[h_j] \} + \{ \dot{l}_{\beta_j}(\theta_0; z) - \dot{l}_{\zeta}(\theta_0; z)[h_j^*] \} \\ &= A_1 + A_2 + A_3 + A_4, \end{aligned}$$

where  $A_1 \in \mathcal{F}_{n,j}^{\beta}(\eta)$  and  $A_2 \in \mathcal{F}_{n,j}^{\zeta}(\eta)$  defined in Lemma 7.6,  $A_3 \in \mathcal{F}_n^j(\eta)$  defined in Lemma 7.5, and  $A_4$  is a fixed function (the efficient score function).

Assume  $A_m^L \leq A_m \leq A_m^U$  with  $\|A_m^U - A_m^L\|_\infty \lesssim \varepsilon$ ,  $m = 1, 2, 3$ . Then  $A_m^L + A_{m'}^L \leq A_m + A_{m'} \leq A_m^U + A_{m'}^U$  with  $\|(A_m^U + A_{m'}^U) - (A_m^L + A_{m'}^L)\|_\infty \leq \|A_m^U - A_m^L\|_\infty + \|A_{m'}^U - A_{m'}^L\|_\infty \lesssim \varepsilon$ . Therefore the  $\varepsilon$ -bracketing number associated with  $\|\cdot\|_\infty$  for  $\mathcal{F}_{n,j}^{\beta,\zeta}(\eta)$  is also bounded by  $(\eta/\varepsilon)^{cq_n+\alpha}$ .

We next define the class of functions

$$\begin{aligned} \mathcal{F}_{n,jk}^{\beta,\zeta}(\eta) = & \{(\dot{l}_{\beta_j}(\theta; z) - \dot{l}_\zeta(\theta; z)[h_j])(\dot{l}_{\beta_k}(\theta; z) - \dot{l}_\zeta(\theta; z)[h_k]) : \theta \in \Theta_n^p, \\ & h_j, h_k \in \mathcal{H}_n^{p-1}, d(\theta, \theta_0) \leq \eta, \|\dot{g}(\psi(\cdot, \beta)) - \dot{g}_0(\psi(\cdot, \beta_0))\|_2 \leq \eta, \\ & \|h_j - h_j^*\|_\infty \leq \eta, \|h_k - h_k^*\|_\infty \leq \eta\}. \end{aligned}$$

Then if  $B_j^L \leq \dot{l}_{\beta_j}(\theta; z) - \dot{l}_\zeta(\theta; z)[h_j] \leq B_j^U$  and  $B_k^L \leq \dot{l}_{\beta_k}(\theta; z) - \dot{l}_\zeta(\theta; z)[h_k] \leq B_k^U$  with  $\|B_j^U - B_j^L\|_\infty \leq \varepsilon$  and  $\|B_k^U - B_k^L\|_\infty \leq \varepsilon$ , we have  $B_j^* B_k^* \leq (\dot{l}_{\beta_j}(\theta; z) - \dot{l}_\zeta(\theta; z)[h_j])(\dot{l}_{\beta_k}(\theta; z) - \dot{l}_\zeta(\theta; z)[h_k]) \leq B_j^{**} B_k^{**}$ , where  $B_j^*$ ,  $B_k^*$  take values of either  $B_j^L$  or  $B_j^U$ , and the same for  $B_k^*$ ,  $B_k^{**}$ . Thus

$$\begin{aligned} \|B_j^{**} B_k^{**} - B_j^* B_k^*\|_\infty &= \|(B_j^{**} - B_j^*) B_k^{**} + (B_k^{**} - B_k^*) B_j^*\|_\infty \\ &= \|B_j^{**} - B_j^*\|_\infty \|B_k^{**}\|_\infty + \|B_k^{**} - B_k^*\|_\infty \|B_j^*\|_\infty \\ &\lesssim \|B_j^U - B_j^L\|_\infty + \|B_k^U - B_k^L\|_\infty \\ &\lesssim \varepsilon, \end{aligned}$$

which yields

$$N_{[]}(\varepsilon, \mathcal{F}_{n,jk}^{\beta,\zeta}, \|\cdot\|_\infty) \lesssim (1/\varepsilon)^{cq_n+d}$$

for some constant  $c > 0$ .

Finally, similar to the verification of Assumption (A4) in the proof of Theorem 4.2 and together with the following fact:

$$\begin{aligned} & \|h_j^*(\cdot, \beta_0) - h_{j,n}^*(\cdot, \hat{\beta}_n)\|_\infty \\ &= \|\dot{g}_0(t)P(X|\epsilon_0 \geq t) - \dot{g}_n(t_{\hat{\beta}_n})\bar{X}(t_{\hat{\beta}_n}; \hat{\beta}_n)\|_\infty \\ (3.1) \quad & \leq \|\dot{g}_0(t)P(X|\epsilon_0 \geq t) - \dot{g}_n(t)\bar{X}(t; \hat{\beta}_n)\|_\infty \\ & \quad + \|\dot{g}_n(t_{\hat{\beta}_n})\bar{X}(t_{\hat{\beta}_n}; \hat{\beta}_n) - \dot{g}_n(t_{\hat{\beta}_n})\bar{X}(t; \hat{\beta}_n)\|_\infty \\ & \quad + \|\dot{g}_n(t_{\hat{\beta}_n})\bar{X}(t; \hat{\beta}_n) - \dot{g}_n(t)\bar{X}(t; \hat{\beta}_n)\|_\infty, \end{aligned}$$

where the first term on the right hand side of inequality (3.1) is

$$\begin{aligned} & \|\dot{g}_0(t)P(X|\epsilon_0 \geq t) - \dot{g}_n(t)\bar{X}(t; \hat{\beta}_n)\|_\infty \\ & \leq \|\dot{g}_0(t) - \dot{g}_n(t)\|_\infty \|P(X|\epsilon_0 \geq t)\|_\infty \\ & \quad + \|P(X|\epsilon_0 \geq t) - \bar{X}(t; \hat{\beta}_n)\|_\infty \|\dot{g}_n(t)\|_\infty \\ & = O_p(n^{-2v}) + O_p(n^{-1/2}) = O_p(n^{-2v}) \end{aligned}$$

by Lemma 7.4 and Corollary 6.21 in [2] for the first term and straightforward argument using empirical process theory for Donsker classes for the second term, together with the boundedness of  $\|P(X|\epsilon_0 \geq t)\|_\infty$  and  $\|\hat{g}_n(t)\|_\infty$ , and it is straightforward to see that the remaining two terms on the right hand side of inequality (3.1) is  $O_p(n^{-1/2})$ . Thus we have  $I_{1n} = o_p(1)$ .

That  $I_{2n} = o_p(1)$  can be argued directly by the dominated convergence theorem. We now have proved the theorem.

### References.

- [1] DING, Y. (2010). *Some New Insights about the Accelerated Failure Time Model*. Ph.D. Thesis, Biostatistics, University of Michigan.
- [2] SCHUMAKER, L. (1981). *Spline Functions: Basic Theory*. Wiley, New York.
- [3] SHEN, X. and WONG, W. H. (1994). Convergence Rate of Sieve Estimates. *The Annals of Statistics* **22** 580–615.
- [4] WELLNER, J. A. and ZHANG, Y. (2007). Two Likelihood-based Semiparametric Estimation Methods for Panel Count Data with Covariates. *The Annals of Statistics* **35** 2106–2142.

DEPARTMENT OF BIostatISTICS  
UNIVERSITY OF MICHIGAN  
1420 WASHINGTON HEIGHTS  
ANN ARBOR, MI 48109-2029  
E-MAIL: yingding@umich.edu  
bnan@umich.edu
